# Supplementary material for: Dual-targeting of tumor cells and subcellular endoplasmic reticulum via AgPPIX-based Janus nanoparticles for photodynamic/immunotherapy against TNBC
Source: Royal Society of Chemistry journal article supplement (doi:10.1039/d4nr01139b), 2024-01-01
Supplement: d4nr01139b1.pdf [file d4nr01139b1.pdf]

**Supplementary Information**

**Dual-Targeting Tumor and Subcellular Endoplasmic Reticulum via  
AgPPIX-based Janus Nanoparticles for  
Photodynamic/Immunotherapy of Triple-negative Breast Cancer**

Kun Ma ‡\*<sup>a</sup>, He Diao ‡<sup>a</sup>, Xiangyi Xu <sup>a</sup>, Yu Jin <sup>b</sup>, Mingling Qiu <sup>b</sup>, Zicheng Liu <sup>a</sup>, Chenbo Yang <sup>a</sup>, Jiacheng Zhao <sup>a</sup>, Senchao Chai <sup>a</sup>, Qingxian Fang <sup>a</sup>, Zhaoming Guo <sup>a</sup>, Changhao Cui <sup>a</sup>, Jianqiang Xu <sup>a,c</sup>, Liangwei Yin <sup>\*d</sup>, Hai-ying Ma <sup>\*b</sup>

<sup>a</sup> School of Chemical Engineering, Ocean and Life Sciences, Dalian University of Technology, Panjin 124221, Liaoning Province, China

<sup>b</sup> Department of Histology and Embryology, Dalian Medical University, Dalian 116044, Liaoning Province, China

<sup>c</sup> Panjin Institute of Industrial Technology, Dalian University of Technology, Panjin 124221, China

<sup>d</sup> Department of Oncology, Central Hospital of Dalian University of Technology, Dalian 116033, China

‡These authors contributed equally to this study

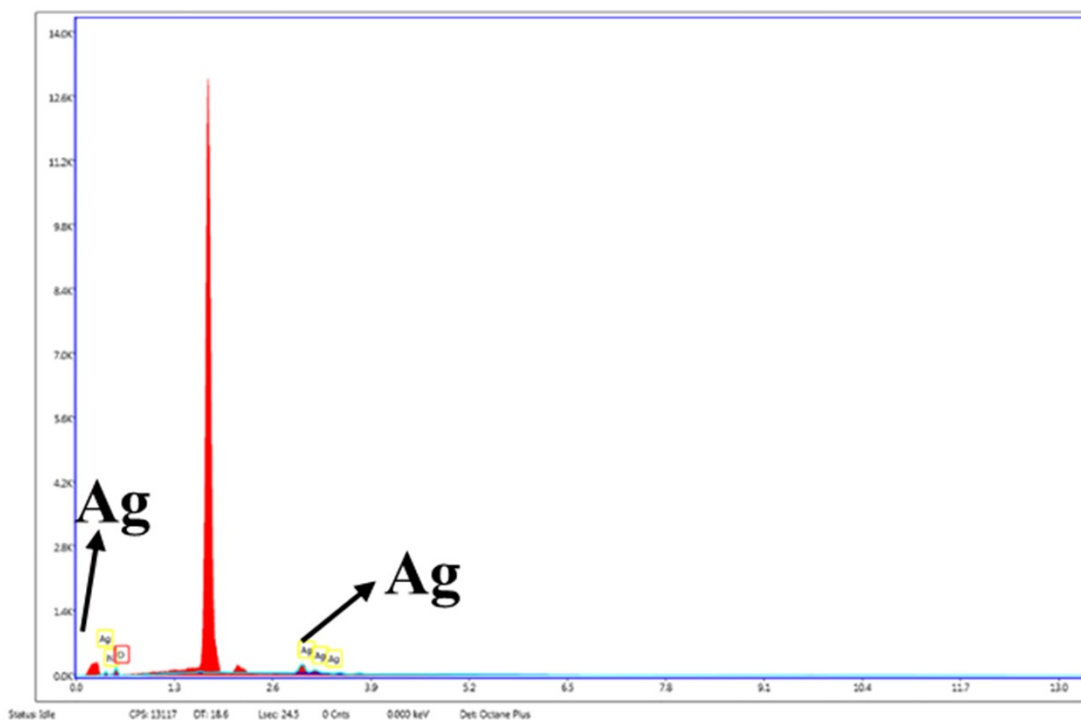

**Figure S1.** EDS result of PAPA.

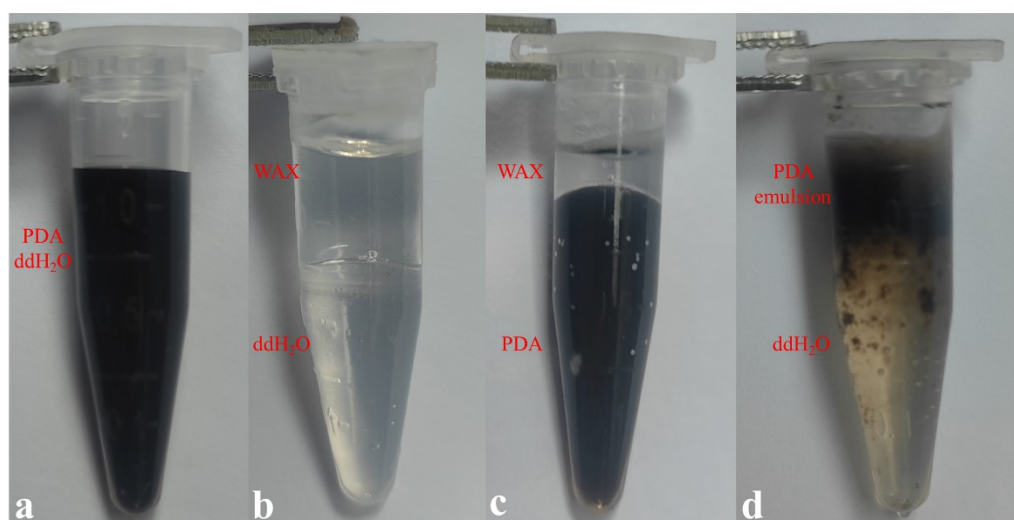

**Figure S2.** The preparation of Pickering emulsions. (a) the PDA NPs suspensions; (b) the physical mixture of paraffin and water; (c); the physical mixture of paraffin and PDA NPs suspensions (d) the Pickering emulsions of paraffin and PDA NPs.

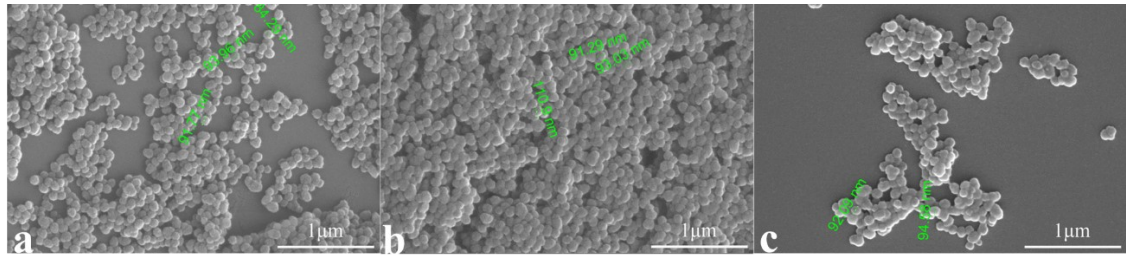

**Figure S3.** SEM image of synthesized NPs. (a) SEM of PA; (b) SEM of PAP; (c) SEM of PAC. Scale bar: 1 μm.

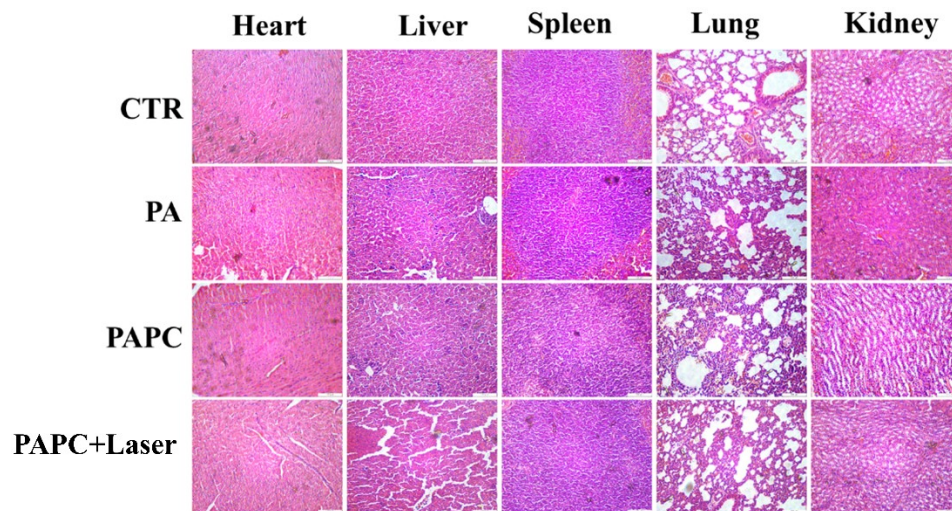

**Figure S4.** The histologic section of heart, live, spleen, lung, kidney with H&E staining after treated by saline, PA, PAPC without laser and PAPC with laser. Scale bar: 500 μm.

**Table. S1.** IC50 of AgPPIX, PA, PAP, PAC and PAPC (Without Laser; With Laser).

| <b>Nanomedicine</b> | <b>Without Laser (IC50)</b> | <b>With Laser (IC50)</b> |
|---------------------|-----------------------------|--------------------------|
| AgPPIX              | 56.18 $\mu\text{g/mL}$      | 65.38 $\mu\text{g/mL}$   |
| PA                  | 45.10 $\mu\text{g/mL}$      | 37.81 $\mu\text{g/mL}$   |
| PAP                 | 44.44 $\mu\text{g/mL}$      | 35.32 $\mu\text{g/mL}$   |
| PAC                 | 37.79 $\mu\text{g/mL}$      | 25.09 $\mu\text{g/mL}$   |
| PAPC                | 22.96 $\mu\text{g/mL}$      | 16.55 $\mu\text{g/mL}$   |
